Transcriptome of human foetal heart compared with cardiomyocytes from pluripotent stem cells

C.W. van den Berg<sup>1</sup>, S. Okawa<sup>2</sup>, S.M. Chuva de Sousa Lopes<sup>1</sup>, L. van Iperen<sup>1</sup>, R. Passier<sup>1</sup>, S.R. Braam<sup>3</sup>, L.G. Tertoolen<sup>1</sup>, A. del Sol<sup>2</sup>, R.P. Davis<sup>1,4</sup>, C.L. Mummery<sup>1,4,5</sup>

<sup>1</sup> Dept. of Anatomy & Embryology, Leiden University Medical Center; Einthovenweg 20, 2333 ZC, Leiden, The Netherlands

<sup>2</sup> Luxembourg Centre for Systems Biomedicine, University of Luxembourg; 6, Avenue du Swing, L-4366 Belvaux, Luxembourg

<sup>3</sup> Pluriomics B.V., Biopartner building 3, Galileiweg 8, 2333 BD, Leiden, The Netherlands

<sup>4</sup> These authors contributed equally

<sup>5</sup> Corresponding author

**KEYWORDS**

Human heart development, gene expression profiling, human pluripotent stem cells

## SUMMARY

Differentiated derivatives of human pluripotent stem cells (hPSCs) are often considered immature because they resemble foetal cells more than adult, with hPSC-derived cardiomyocytes (hPSC-CMs) being no exception. Many functional features of these CMs, such as their cell morphology, electrophysiological characteristics, sarcomere organization and contraction force, are underdeveloped compared to adult cardiomyocytes. However relatively little is known on how their gene expression profiles compare to the human foetal heart, in part because of the paucity of data on the human foetal heart at different stages of development. Here, we collected samples of matched ventricles and atria from human fetuses during the first and second trimester of development. This presented a rare opportunity to perform gene expression analysis on the individual chambers of the heart at various stages of development, allowing us to identify genes not only involved in the formation of the heart, but also specific genes upregulated in each of the four chambers and at different stages of development. The data showed that hPSC-CMs had a gene expression profile similar to first trimester foetal heart but after culture in conditions shown previously to induce maturation, they cluster closer to the second trimester foetal heart samples. In summary, we demonstrate how the gene expression profiles of human foetal heart samples can be used for benchmarking hPSC-CMs and also contribute to determining their equivalent stage of development.

## INTRODUCTION

In the developing embryo, the heart is one of the first organs to be fully formed. It develops from a linear tube into a four-chambered organ through a complex looping process which leads to the formation of the ventricles, the atria and the outflow tract. In humans, the heart starts beating around 6 weeks of gestation and pumps blood through a closed circulatory system to provide nutrients, oxygen and remove waste products from organs as they develop. Later, the septum separates the atria into left and right halves and closes completely after birth. The left and right ventricles are separated before birth and their walls develop into strong muscles (Moorman et al., 2003). The left ventricular wall is thicker than the right because it pumps oxygenated blood from the lungs to all parts of the body via the aorta. The right side of the heart receives de-oxygenated blood and pumps it through the lungs to re-oxygenate. Although much is known about molecular mechanisms that drive heart formation and morphogenesis in laboratory animals (Harvey, 2002), little equivalent data is available on the human heart. This is important for understanding how specific mutations in different genes (i.e. missense mutations), rather than knockouts commonly used in experimental animals, affect human heart development and function as well as validating models of hereditary heart disease based on patient derived human induced pluripotent stem cells (hiPSC).

The four chambers of the mammalian heart express different genes that determine their physiological properties (Small and Krieg, 2004). Most studies to date have analyzed the transcriptome of adult human atria and ventricles (Asp et al., 2012), or have performed transcriptional analysis on human auricle (part of the atrium) removed during normal clinical procedures on diseased adult hearts (Sanoudou et al., 2005; Nanni et al., 2006). Collection of healthy human ventricular tissue is more difficult and is usually only available when donor hearts are not used for transplantation. Here, we collected tissue from the chambers of human foetal hearts in isogenically matched combinations of atria and ventricles from either first (T1) or second (T2) trimester of development and examined gene expression as a function of gestational age and region of the heart. Using the advanced microarray techniques now available, we were able to compare transcriptomes of foetal tissue using small amounts of RNA (<0.5 ug). These studies not only provided better insight into how the human heart

develops, but also allowed us to compare these samples to cardiomyocytes (CMs) derived from human pluripotent stem cells (hPSCs).

hPSCs are now frequently used to investigate CM differentiation in the early embryo and also to model inherited cardiac disease (Davis et al., 2011). While it is widely acknowledged that hPSC-derived CMs (hPSC-CMs) are immature (Yang et al., 2014), how they compare with the individual chambers of human foetal hearts is not clear. We have examined hPSC-CMs cultured in conventional (defined) differentiation medium (van den Berg et al., 2015), and in medium recently reported to induce functional maturation as evidenced by increased force of contraction (Ribeiro et al., 2015). We found that the foetal gene expression profiles allowed us to estimate the maturity of the hPSC-CMs.

## **RESULTS AND DISCUSSION**

### **Global gene expression analysis of foetal and adult heart samples show changes with age**

We determined the transcriptional profiles of human foetal hearts collected during T1 and T2 of normal human development. We separated T1 hearts into atrium and ventricle. As T2 hearts were larger, we collected the four chambers separately. We also included a commercially available sample of pooled adult hearts as a common reference for normalization of future samples (Fig. 1A and Table S1). Human foetal heart samples were a mixed population of cardiomyocytes, fibroblasts and endothelial cells since there are no specific cell surface antibodies for cardiomyocytes that would allow them to be sorted from primary heart tissue; however, the majority of the cells in the foetal heart are cardiomyocytes. This decreases postnatally when cardiomyocyte division ceases (Bergmann et al., 2015).

To compare the variability between all samples, we performed gene expression cluster analysis (Fig. 1B). We found that the foetal heart samples showed distinct gene expression profiles between T1 and T2. From the T1 and T2 samples, the atria and ventricles clustered separately, except for the foetal heart (FH) FH5-right atrium (RA), FH5-right ventricle (RV), FH5-left ventricle (LV) samples which clustered together as individual number 5. T2 ventricle samples clustered closer to the adult heart reference samples, possibly because the contribution of ventricles to the pooled adult reference sample is greater than the (smaller) atria.

We also grouped samples based on age (7 weeks, 15 weeks, 20 weeks and adult) and investigated all differentially expressed genes (DEGs) in the first and second trimester and adult hearts.

We identified 8 distinct transcriptome clusters (Fig. 1C). The DEGs in Cluster 1 were upregulated at 7 weeks, showed no changes in 15- and 20-week samples and decreased in adult heart. Cluster 2 showed a similar pattern; DEGs in both clusters were involved in cell cycle regulation and chromatin organization. DEGs in Cluster 3 were upregulated during foetal development and downregulated in adult heart. This cluster included genes important in development, cell division and matrix organization that are less important in adult hearts unless the heart has been damaged, for example by myocardial infarction. As the heart develops and ages, CM proliferation that is essential during early heart development decreases (Bergmann et al., 2015). Cluster 4 showed genes that gradually decreased over time and were involved in cell cycle regulation and chromatin organization. Cluster 5 contained DEGs involved in gaseous substance transport; these were downregulated at week 7 and in adult heart but were upregulated at intermediate stages. Clusters 6, 7 and 8 consisted of DEGs that increased over time and are important in metabolic processes, muscle organization and contraction. The foetal heart depends on carbohydrate synthesis, but it also prepares for the switch in metabolism to fatty acid oxidation shortly after birth (Taegtmeyer et al., 2010). Gene ontology terms for biological processes (GO.BP) for each cluster are listed in Table S2.

### **First and second trimester atria and ventricles have distinct gene expression signatures**

To investigate genes that are important for development of atria and ventricles, we divided samples into 4 groups according to their origin and age: atria T1 (A1), ventricles T1 (V1), atria T2 (A2) and ventricles T2 (V2). Four comparisons were made to investigate differences in gene expression between atria and ventricles, and also between T1 and T2. Gender did not appear to influence gene expression in the heart with only genes located on the sex chromosomes (i.e. *XIST*, *RPS4Y2*, *DDX3Y*, *RPS4Y1*, *EIF1AY*) differentially expressed between age-matched male and female samples. In subsequent analyses we therefore combined male and female samples. Using an absolute log<sub>2</sub> fold difference  $\geq 1.5$  in combination with a significance threshold of p-adjusted value of 0.05, we identified a total of 156 DEGs. Performing 2-way clustering of all DEGs revealed distinct transcription profiles

within all four groups (Fig. 2A). In contrast to the clustering based on the global gene expression in Fig. 1B, all samples now separated based on the trimester and chamber subtype. We found 24 DEGs in T1 atrium versus ventricle (A1/V1), 34 in T2 atrium versus ventricle (A2/V2), 110 in T2 versus T1 atria (A2/A1) and 39 in T2 versus T1 ventricles (V2/V1) (Table S3). Fig. 2B shows the overlap between the four comparisons, with the upper Venn diagram focusing on differences between atria and ventricles and the lower diagram on age. Overall few genes overlapped between atria and ventricles and DEGs included genes that were reported to be expressed in a chamber-specific pattern in both mouse and human, such as *NR2F1*, *MYL2* and *KCNA5*. Between T1 and T2, the number of overlapping genes per chamber was higher and correlated to chromatin and nucleosome structure (down) and extracellular matrix and collagen organization (up). The volcano plots in Fig. 2C display the DEGs, with selected genes highlighted based on the results here and from earlier publications on the adult cardiac transcriptome (Ng et al., 2010; Lu et al., 2014).

Both in T1 and T2 atria vs ventricle, *MYL2* was downregulated, reflecting its importance in ventricle contraction, while *KCNA5* encoding the potassium channel  $K_v1.5$  that conducts  $I_{Kur}$ , a major repolarizing current in human atria (Christophersen et al., 2013), was upregulated. *MYL3* and *MYH7* were also described previously as differentially expressed in gene and protein studies comparing atria and ventricles in adult (Asp et al., 2012; Lu et al., 2014). Among the genes expressed at higher levels in T1 and T2 atria compared to similarly aged ventricles was *NR2F1* (*COUP-TFI*) and *RELN*. *NR2F1* was recently shown to be enriched in the atria of human foetal as well as adult hearts and to regulate atrial-specific ion channel genes in atrial hPSC-CMs (Devalla et al., 2015). *RELN* is involved in neuron migration and brain development (Tissir and Goffinet, 2003), but has not previously been described in foetal heart development. Other studies have also detected higher expression levels of *RELN* in human adult atria (Kaab et al., 2004), although its exact function in the heart is unknown.

Chromatin remodelling and histone modifications are also known to have an important role in heart development (Han et al., 2011; Chang and Bruneau, 2012). Genes encoding histones that influence nucleosome structure and are important in compaction of DNA (*HIST1H3I*, *HIST1H2BM*, *HIST1H2AI*), were mainly downregulated in T2 ventricles and atria, and to our knowledge have not

previously been described in cardiac development. Genes important for extracellular matrix and collagen fibril organization (*COL1A2*, *COL12A1*, *COL15A1*, *DPT*) were upregulated in the T2 samples indicating further development of the cardiac scaffold and maturation of the heart. Among the DEGs were also genes involved in cardiac development, electrical currents and sarcomere structure, such as *BMP10*, *APLNR*, *PLN*, *TNNI3K* and *MYOM2*. *BMP10* has been reported in mouse heart development (Chen et al., 2004) and previous studies have also detected *BMP10*, which is involved in the trabeculation of the heart, to be more highly expressed in atria (Asp et al., 2012; Lu et al., 2014).

### **Selected Gene Ontology terms show chamber-biased expression**

To explore the functional characteristics of the DEGs, we performed gene ontology analysis for GO.BP. Fig. 3 and Table S4 display GO.BP terms with adjusted p-value  $\leq 0.01$ . As expected, among the genes expressed at lower levels in A2 versus V2 were those related to ventricle development, contraction and muscle morphogenesis and structure (Fig. 3A). In A2 compared to A1, chromatin and nucleosome organizational genes were downregulated suggesting that a process of active chromatin remodeling is slowing down at this stage of development. No GO terms were enriched when V2 and V1 were compared. GO.BP terms involved in extracellular matrix organization, wound healing and blood coagulation were upregulated in T2 compared to T1 and included genes such as *VWF* and *APLNR* (Fig. 3B). Foetal genes are typically upregulated during remodeling of the adult heart, for example after myocardial infarction, due to the activation of pathways such as wound healing and stress responses (Gidh-Jain et al., 1998; Zgheib et al., 2014). We also found a significant overrepresentation of genes in atrial samples involved in neuron generation, forebrain development or neuron migration, such as *NR2F1* and *NR2F2*. This is most likely due to innervation of the heart and the control of cardiac rhythm by the autonomous nervous system (the vagus nerve around the sinus node) at this stage of development (Kimura et al., 2012), or due to genes that are expressed both in atria and the brain (Alfano et al., 2014).

## The foetal heart transcriptome can indicate the maturation state of hPSC-CMs

To demonstrate the utility of this dataset, we compared human embryonic stem cell (hESC)- and hiPSC-derived CMs to the foetal heart samples with the expectation that this would provide insight into how their gene expression profiles relate to primary cardiac tissue (Fig. 4A). An earlier study described the similarities and differences between foetal heart samples and CMs but the hESC-derived CMs included were derived from mixed population clusters and foetal heart samples were only obtained from third trimester donors (Synnergren et al., 2012). Here we had the opportunity to compare the hPSC-CMs with primary tissue at earlier stages of foetal development and from different chambers of the heart.

hPSC-CMs were initially purified from mixed populations of differentiated cells maintained in LI-BPEL medium on the basis of the reporter gene eGFP, which had been inserted into the cardiac transcription factor NKX2.5 genomic locus of hESC (Elliott et al., 2011) and hiPSC (van den Berg, Mummery, Davis, unpublished). The differentiation protocols used here yield primarily ventricular-like cardiomyocytes on the basis of action potentials in patch clamp electrophysiology (Davis et al., 2012; Bellin et al., 2013) and by excluding the NKX2.5-GFP<sup>-</sup> cardiomyocytes, we also excluded pacemaker-like cells (Birket et al, 2015, in press). Furthermore, we also examined hESC-derived CMs that were cultured in commercially available maturation medium (MM) containing T3 hormone as a principle component (Ribeiro et al., 2015). To examine similarities and differences between *in vitro* hPSC-CMs and foetal heart, we compared transcriptional profiles of the samples with the foetal heart from each trimester. Initially we performed hierarchical clustering of all PSC-derived cardiomyocytes together with all foetal heart samples (Fig. S1). As expected, all the foetal heart samples clustered closer to each other than to the hPSC-CMs. However we did observe that hPSC-CMs cultured in maturation medium clustered closer to the foetal heart samples than to the hPSC-CMs maintained in standard culture medium, suggesting that the cardiomyocytes indeed developed further. To investigate which foetal heart age group the hPSC-CMs in LI-BPEL or MM most closely matched, we performed the clustering of the hPSC-CMs with the foetal heart samples from T1 and T2 separately (Fig 4B&C). The cells maintained in the regular LI-BPEL culture medium were more closely related to T1 foetal heart samples than hPSC-CMs cultured in MM. When comparing the *in vitro* CMs to T2 samples, the



CMs that had been maintained in MM more closely resembled the T2 heart. The partial maturation of the hESC-CMs in MM that we observed correlated well with another recent study that also showed individual hPSC-CMs cultured in MM developed functional features closer to that of T2 foetal cardiomyocytes, with most strikingly a > 2-fold increase in contraction stress when compared to regular differentiation conditions (Ribeiro et al., 2015).

## **Conclusions**

We have analyzed here gene expression profiles in a rare and complete set of isogenic foetal heart samples and described differences in genes expressed between different chambers of the heart during the first and second trimester of development. We showed that microarray analysis could be performed on RNA samples as small as 50 ng, a technical advance that allowed inclusion of hearts at the very earliest stages of development. Our results revealed a group of nucleosome- and histone-related genes expressed in human foetal hearts that to our knowledge have not been described before in cardiac development in mice. Furthermore we demonstrated how the foetal heart dataset can be used to benchmark hPSC-CMs in terms of their maturation state. The question of how mature hPSC-CMs are frequently arises and our dataset provides a means of answering this by global gene expression rather than on the basis of specific markers. We have included two commercially available reference RNA sets in the analysis in order to characterize future sets of hPSC-CMs cultured in conditions that further induce maturation improvements. These reference sets can be used by other laboratories, as well as with other microarray platforms, for normalization and benchmarking of future datasets to the human foetal heart dataset. The foetal heart dataset is provided here as a resource to the community.

## **MATERIALS AND METHODS**

An expanded Material and Methods section is available in the online Supplement.

### **Foetal heart sample collection and ethics statement**

Human foetal heart samples were collected from 8 healthy individuals after elective abortions at various gestational ages (7, 10, 15, 20 and 20+ weeks of gestation) determined using obstetric ultrasonography based on crown-rump length measurements. The Medical Ethical Committee of the Leiden University Medical Center (protocol 08.087) approved the use of human foetal material and informed written consent was obtained in accordance with the WMA Declaration of Helsinki guidelines.

### **Data analysis and statistics**

The raw intensity values of the microarray data were normalized by variance stabilizing normalization using the vsn R package (Huber et al., 2002) and subsequently normalized by the common references. The differential expression analysis was performed using the limma R package (Smyth, 2004). The p-value was corrected for multiple testing by the Benjamini-Hochberg method with an adjusted p-value cutoff 0.05. Genes with the mean absolute log<sub>2</sub> fold-change less than 1.5 were discarded. Unsupervised hierarchical clustering of all detected genes was performed using the euclidean distance and complete linkage method. The same parameters were used for clustering the DEGs. GO.BP was downloaded from <http://www.geneontology.org>. Categories with an adjusted p-value below 0.01 and odds ratio above 1.0 were considered significantly enriched.

### **Cardiac differentiation of human ESCs and iPSCs**

hPSCs were differentiated to CMs as previously described (Elliott et al., 2011; van den Berg et al., 2015) and maintained either in LI-BPEL (Elliott et al., 2011), or according to the manufacturer's protocol (Pluricyte Medium, Pluriomics). To isolate CMs from the NKX2-5-eGFP reporter hESC and hiPSC lines (Elliott et al., 2011) (C.W. van den Berg, C.L. Mummery, R.P. Davis, unpublished), the

cells were dissociated (van den Berg et al., 2015) and sorted based on GFP expression using a BD FACS Aria™ III Cell Sorter (BD Biosciences).

## FIGURES

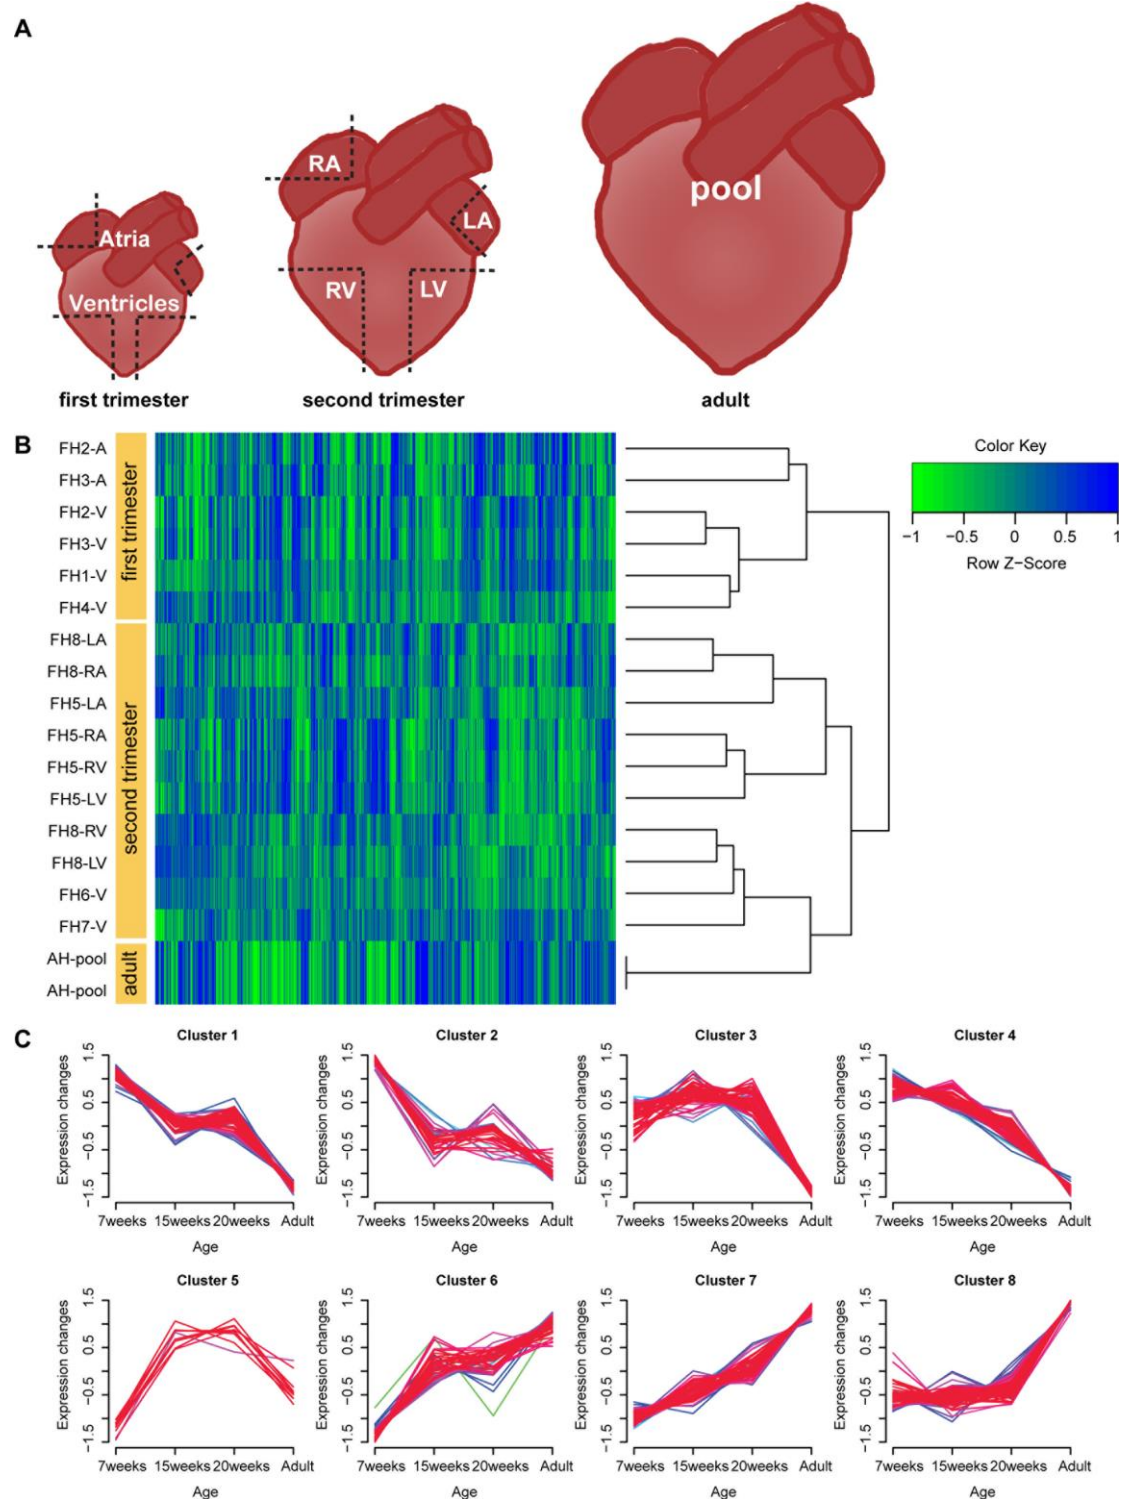

Figure 1: Hierarchical and fuzzy clustering of foetal heart samples. A) Schematic of collected samples from atria and ventricles of first and second trimester, and the commercial reference of pooled adult

hearts. Dissection edges are indicated by dashed lines. B) Unsupervised hierarchical clustering on the global gene expression data. C) Fuzzy clustering showing all differentially expressed genes based on their expression at 7 weeks, 15 weeks, 20 weeks and adult stage.

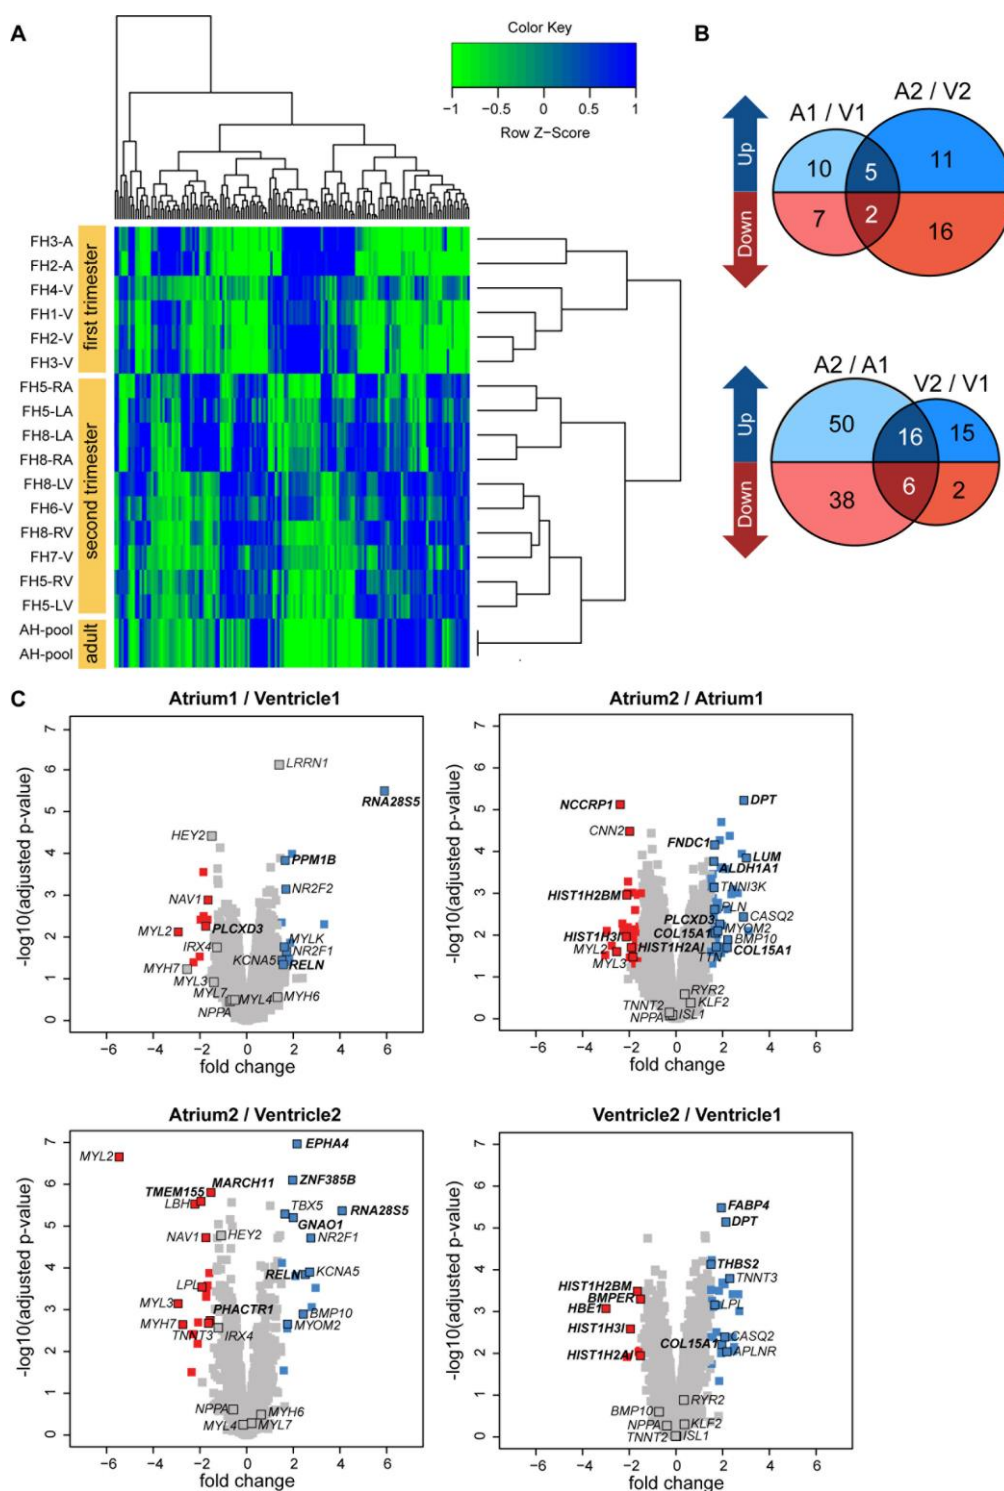

Figure 2: Comparison of differentially expressed genes (DEGs) between first and second trimester atria and ventricles. A) Unsupervised hierarchical clustering of the 156 DEGs identified. The dendrogram demonstrates separation of the samples on first and second trimester and atria and

ventricles. B) The Venn diagrams show the number of DEGs in each comparison and the number of overlapping genes between the atria and ventricles per trimester (top) and first and second trimester per chamber (bottom). C) The Volcano plots show the total gene expression with positive (blue) and negative (red)  $\log_2$  fold difference  $\geq 1.5$  (x-axis) against adjusted p-value  $\leq 0.05$  (y-axis). All other genes with adjusted p-value  $> 0.05$  are indicated in grey. Selected previously known genes and results from this study are highlighted. Genes not previously reported are indicated in bold.

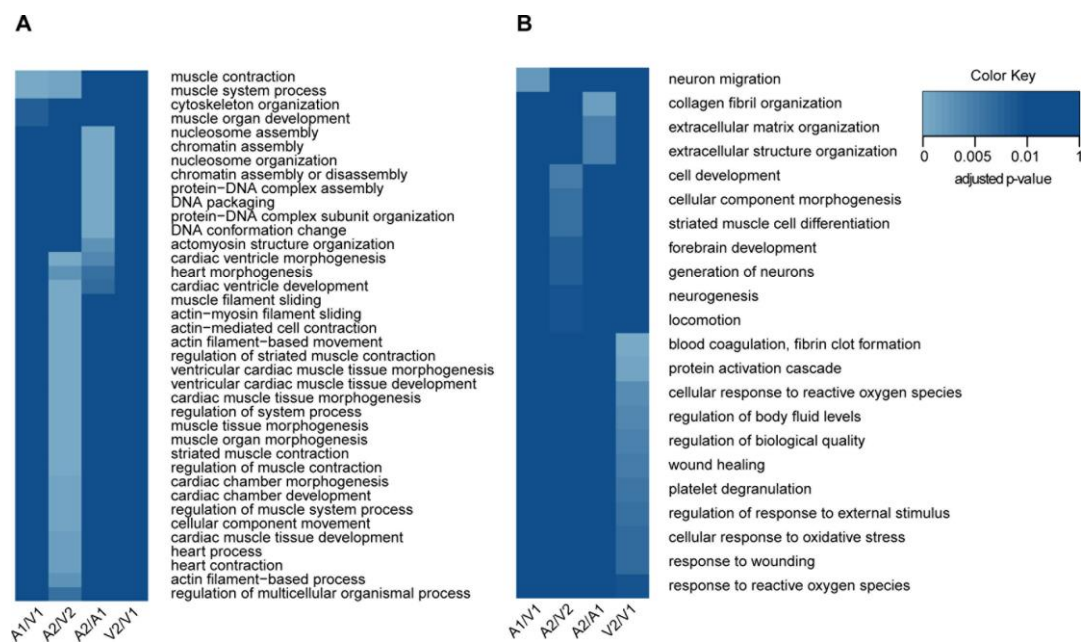

Figure 3: Enriched Gene Ontology terms belonging to biological processes (GO.BP). Enriched GO terms of A) downregulated and B) upregulated differentially expressed genes for comparisons atria first trimester (A1)/ventricles first trimester (V1), atria second trimester (A2)/ventricles second trimester (V2), A2/A1 and V2/V1. Significantly enriched GO terms (adjusted p-value  $\leq 0.01$ ) are shown in light blue.



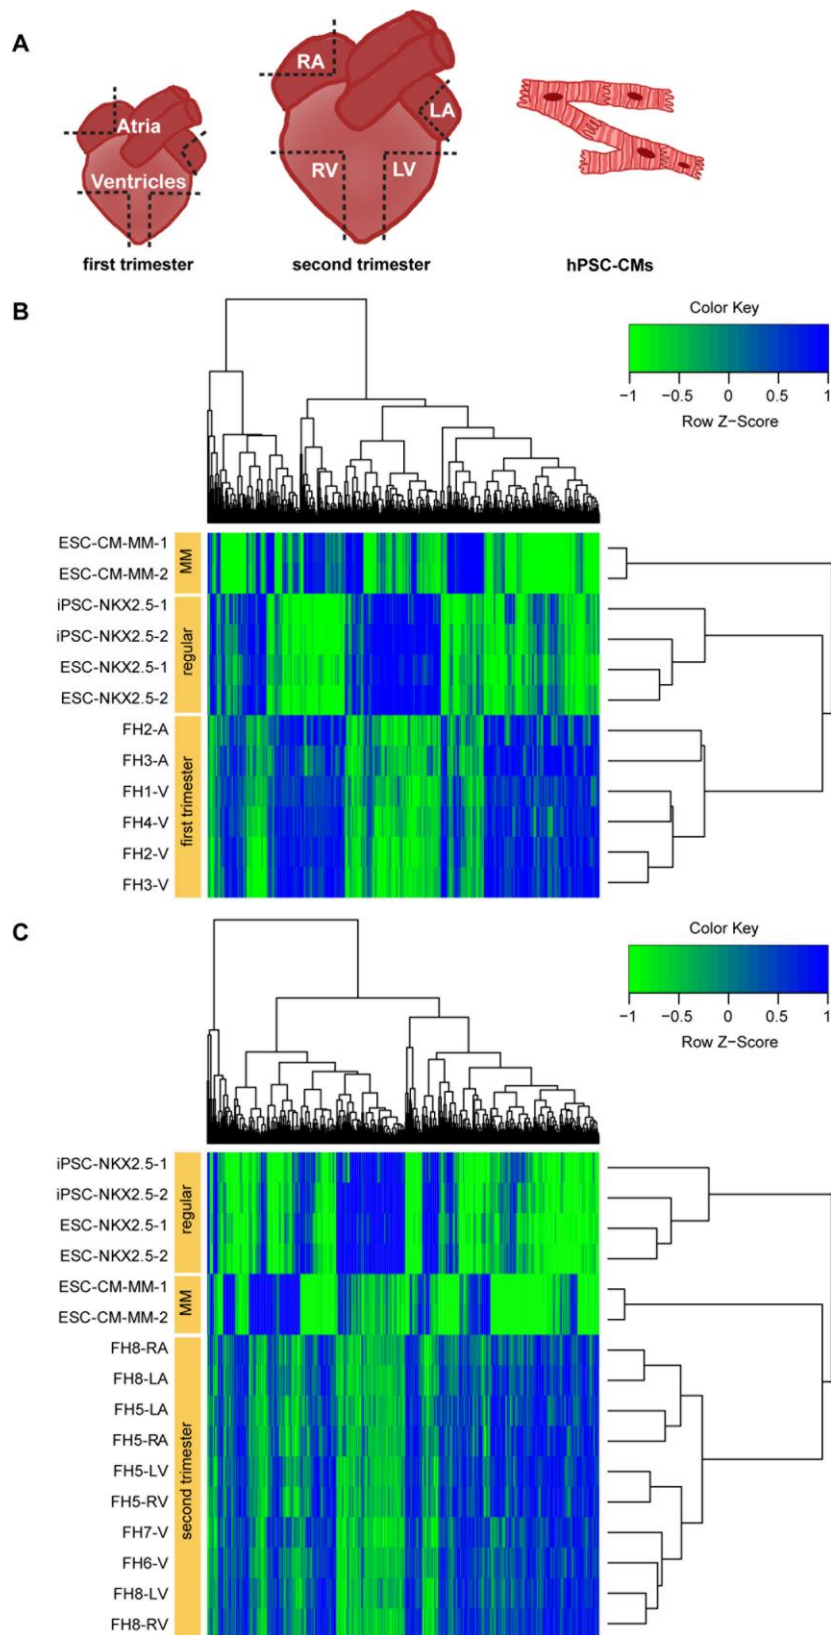

Figure 4: Hierarchical clustering of differentially expressed genes between foetal heart samples and human pluripotent stem cell derived cardiomyocytes (hPSC-CMs). A) Schematic of compared samples

from atria and ventricles of first and second trimester, and the hPSC-CMs. Dissection edges of the foetal heart samples are indicated by dashed lines. B) First trimester foetal heart samples and C) second trimester foetal heart samples are compared to hPSC-CMs in LI-BPEL differentiation medium (regular) and maturation medium (MM).

## ACKNOWLEDGEMENTS

The authors thank C. Grandela for experiments and providing hPSC-CM samples, H.D. Devalla for input in early stages of the study and M.S. Roost for advice on array analysis.

### Competing interests

SRB, RP and CLM are co-founders and SRB CSO of Pluriomics B.V.

### Author contributions

CWvdB performed the experiments; CWvdB, SO performed data analysis; CWvdB, SO, RP, RPD, CLM developed concepts, interpreted the results and prepared the manuscript; SCdSL, LvI, SRB, LGT performed experiments and contributed reagents.

### Funding

Funding was from the Netherlands Institute of Regenerative Medicine (NIRM, FES0908; CWvdB, SRB, CLM), Fonds National de la Recherche Luxembourg (FNR, AFR Postdoctoral Grant; SO), the European Research Council (ERC Advanced StemCardioVasc; RPD, CLM), the Netherlands Heart Foundation (NHS: CVON-HUSTCARE; CLM, RP), NWO-Aspasia (015.007.037; SCdSL), and Interuniversity Attraction Poles (IAP, P7/07; SCdSL, CLM).

## REFERENCES

- Alfano, C., Magrinelli, E., Harb, K. and Studer, M.** (2014). The nuclear receptors COUP-TF: a long-lasting experience in forebrain assembly. *Cell Mol Life Sci* **71**, 43-62.
- Asp, J., Synnergren, J., Jonsson, M., Dellgren, G. and Jeppsson, A.** (2012). Comparison of human cardiac gene expression profiles in paired samples of right atrium and left ventricle collected in vivo. *Physiol Genomics* **44**, 89-98.
- Bellin, M., Casini, S., Davis, R. P., D'Aniello, C., Haas, J., Ward-van Oostwaard, D., Tertoolen, L. G., Jung, C. B., Elliott, D. A., Welling, A. et al.** (2013). Isogenic human pluripotent stem cell pairs reveal the role of a KCNH2 mutation in long-QT syndrome. *EMBO J* **32**, 3161-3175.
- Bergmann, O., Zdunek, S., Felker, A., Salehpour, M., Alkass, K., Bernard, S., Sjoström, S. L., Szewczykowska, M., Jackowska, T., Dos Remedios, C. et al.** (2015). Dynamics of Cell Generation and Turnover in the Human Heart. *Cell* **161**, 1566-1575.
- Chang, C. P. and Bruneau, B. G.** (2012). Epigenetics and cardiovascular development. *Annu Rev Physiol* **74**, 41-68.
- Chen, H., Shi, S., Acosta, L., Li, W., Lu, J., Bao, S., Chen, Z., Yang, Z., Schneider, M. D., Chien, K. R. et al.** (2004). BMP10 is essential for maintaining cardiac growth during murine cardiogenesis. *Development* **131**, 2219-2231.
- Christoffersen, I. E., Olesen, M. S., Liang, B., Andersen, M. N., Larsen, A. P., Nielsen, J. B., Haunso, S., Olesen, S. P., Tveit, A., Svendsen, J. H. et al.** (2013). Genetic variation in KCNA5: impact on the atrial-specific potassium current IKur in patients with lone atrial fibrillation. *Eur Heart J* **34**, 1517-1525.
- Davis, R. P., van den Berg, C. W., Casini, S., Braam, S. R. and Mummery, C. L.** (2011). Pluripotent stem cell models of cardiac disease and their implication for drug discovery and development. *Trends Mol Med* **17**, 475-484.

- Davis, R. P., Casini, S., van den Berg, C. W., Hoekstra, M., Remme, C. A., Dambrot, C., Salvatori, D., Oostwaard, D. W., Wilde, A. A., Bezzina, C. R. et al.** (2012). Cardiomyocytes derived from pluripotent stem cells recapitulate electrophysiological characteristics of an overlap syndrome of cardiac sodium channel disease. *Circulation* **125**, 3079-3091.
- Devalla, H. D., Schwach, V., Ford, J. W., Milnes, J. T., El-Haou, S., Jackson, C., Gkatzis, K., Elliott, D. A., Chuva de Sousa Lopes, S. M., Mummery, C. L. et al.** (2015). Atrial-like cardiomyocytes from human pluripotent stem cells are a robust preclinical model for assessing atrial-selective pharmacology. *EMBO Mol Med*.
- Elliott, D. A., Braam, S. R., Koutsis, K., Ng, E. S., Jenny, R., Lagerqvist, E. L., Biben, C., Hatzistavrou, T., Hirst, C. E., Yu, Q. C. et al.** (2011). NKX2-5(eGFP/w) hESCs for isolation of human cardiac progenitors and cardiomyocytes. *Nat Methods* **8**, 1037-1040.
- Gidh-Jain, M., Huang, B., Jain, P., Gick, G. and El-Sherif, N.** (1998). Alterations in cardiac gene expression during ventricular remodeling following experimental myocardial infarction. *J Mol Cell Cardiol* **30**, 627-637.
- Han, P., Hang, C. T., Yang, J. and Chang, C. P.** (2011). Chromatin remodeling in cardiovascular development and physiology. *Circ Res* **108**, 378-396.
- Harvey, R. P.** (2002). Patterning the vertebrate heart. *Nat Rev Genet* **3**, 544-556.
- Huber, W., von Heydebreck, A., Sultmann, H., Poustka, A. and Vingron, M.** (2002). Variance stabilization applied to microarray data calibration and to the quantification of differential expression. *Bioinformatics* **18 Suppl 1**, S96-104.
- Kaab, S., Barth, A. S., Margerie, D., Dugas, M., Gebauer, M., Zwermann, L., Merk, S., Pfeufer, A., Steinmeyer, K., Bleich, M. et al.** (2004). Global gene expression in human myocardium-oligonucleotide microarray analysis of regional diversity and transcriptional regulation in heart failure. *J Mol Med (Berl)* **82**, 308-316.
- Kimura, K., Ieda, M. and Fukuda, K.** (2012). Development, maturation, and transdifferentiation of cardiac sympathetic nerves. *Circ Res* **110**, 325-336.
- Lu, Z. Q., Sinha, A., Sharma, P., Kislinger, T. and Gramolini, A. O.** (2014). Proteomic analysis of human fetal atria and ventricle. *J Proteome Res* **13**, 5869-5878.

- Moorman, A. F., Webb, S., Brown, N. A., Lamers, W. and Anderson, R. H.** (2003). Development of the heart: (1) formation of the cardiac chambers and arterial trunks. *Heart* **89**, 806-814.
- Nanni, L., Romualdi, C., Maseri, A. and Lanfranchi, G.** (2006). Differential gene expression profiling in genetic and multifactorial cardiovascular diseases. *J Mol Cell Cardiol* **41**, 934-948.
- Ng, S. Y., Wong, C. K. and Tsang, S. Y.** (2010). Differential gene expressions in atrial and ventricular myocytes: insights into the road of applying embryonic stem cell-derived cardiomyocytes for future therapies. *Am J Physiol Cell Physiol* **299**, C1234-1249.
- Ribeiro, M. C., Tertoolen, L. G., Guadix, J. A., Bellin, M., Kosmidis, G., D'Aniello, C., Monshouwer-Kloots, J., Goumans, M. J., Wang, Y., Feinberg, A. W. et al.** (2015). Functional maturation of human pluripotent stem cell derived cardiomyocytes in vitro—Correlation between contraction force and electrophysiology. *Biomaterials* **51**, 138–150.
- Sanoudou, D., Vafiadaki, E., Arvanitis, D. A., Kranias, E. and Kontrogianni-Konstantopoulos, A.** (2005). Array lessons from the heart: focus on the genome and transcriptome of cardiomyopathies. *Physiol Genomics* **21**, 131-143.
- Small, E. M. and Krieg, P. A.** (2004). Molecular regulation of cardiac chamber-specific gene expression. *Trends Cardiovasc Med* **14**, 13-18.
- Smyth, G. K.** (2004). Linear models and empirical bayes methods for assessing differential expression in microarray experiments. *Stat Appl Genet Mol Biol* **3**, Article3.
- Synergren, J., Ameen, C., Jansson, A. and Sartipy, P.** (2012). Global transcriptional profiling reveals similarities and differences between human stem cell-derived cardiomyocyte clusters and heart tissue. *Physiol Genomics* **44**, 245-258.
- Taegtmeyer, H., Sen, S. and Vela, D.** (2010). Return to the fetal gene program: a suggested metabolic link to gene expression in the heart. *Ann N Y Acad Sci* **1188**, 191-198.
- Tissir, F. and Goffinet, A. M.** (2003). Reelin and brain development. *Nat Rev Neurosci* **4**, 496-505.
- van den Berg, C. W., Elliott, D. A., Braam, S. R., Mummery, C. L. and Davis, R. P.** (2015). Differentiation of Human Pluripotent Stem Cells to Cardiomyocytes Under Defined Conditions. *Methods Mol Biol*.

**Yang, X., Pabon, L. and Murry, C. E.** (2014). Engineering adolescence: maturation of human pluripotent stem cell-derived cardiomyocytes. *Circ Res* **114**, 511-523.

**Zgheib, C., Allukian, M. W., Xu, J., Morris, M. W., Jr., Caskey, R. C., Herdrich, B. J., Hu, J., Gorman, J. H., 3rd, Gorman, R. C. and Liechty, K. W.** (2014). Mammalian fetal cardiac regeneration after myocardial infarction is associated with differential gene expression compared with the adult. *Ann Thorac Surg* **97**, 1643-1650.
